# Supplementary material
Source: HighWire-hosted journal article supplement (https://www.cmaj.ca/highwire/filestream/150295/field_highwire_adjunct_files/0/231241-res-1-at.pdf)
Supplement: 231241-res-1-at.pdf [file 231241-res-1-at.pdf]

## Appendix 1

### Section 1. Consolidated Criteria for Reporting Qualitative Studies (COREQ) Checklist

**Table S1.** Consolidated Criteria for Reporting Qualitative Studies (COREQ) Checklist

| Item                                           | Topic                                    | Guide Questions/Description                                                                                                               | Reported on page no.                                                                                                                                                                                                |
|------------------------------------------------|------------------------------------------|-------------------------------------------------------------------------------------------------------------------------------------------|---------------------------------------------------------------------------------------------------------------------------------------------------------------------------------------------------------------------|
| <b>Domain 1: Research team and reflexivity</b> |                                          |                                                                                                                                           |                                                                                                                                                                                                                     |
| <i>Personal characteristics</i>                |                                          |                                                                                                                                           |                                                                                                                                                                                                                     |
| 1                                              | Interviewer/facilitator                  | Which author/s conducted the interview or focus group?                                                                                    | Study protocol cited in p.2                                                                                                                                                                                         |
| 2                                              | Credentials                              | What were the researcher's credentials? E.g. PhD, MD                                                                                      | Author information                                                                                                                                                                                                  |
| 3                                              | Occupation                               | What was their occupation at the time of the study?                                                                                       | Not reported                                                                                                                                                                                                        |
| 4                                              | Gender                                   | Was the researcher male or female?                                                                                                        | Study Design and Setting p.2-3                                                                                                                                                                                      |
| 5                                              | Experience and training                  | What experience or training did the researcher have?                                                                                      | Study Design and Setting p.2-3                                                                                                                                                                                      |
| <i>Relationship with participants</i>          |                                          |                                                                                                                                           |                                                                                                                                                                                                                     |
| 6                                              | Relationship established                 | Was a relationship established prior to study commencement?                                                                               | Not reported due to word limit. Please note: <i>The research team did not have established relationships with participants beyond the initial contact.</i>                                                          |
| 7                                              | Participant knowledge of the interviewer | What did the participants know about the researcher? e.g. personal goals, reasons for doing the research                                  | Not reported due to word limit. Please note: <i>During initial contact, the participants were provided a brief explanation of the study's purpose and the researchers' affiliations and invited to participate.</i> |
| 8                                              | Interviewer characteristics              | What characteristics were reported about the interviewer/facilitator? e.g. Bias, assumptions, reasons and interests in the research topic | Study protocol cited in p.2                                                                                                                                                                                         |
| <b>Domain 2: Study design</b>                  |                                          |                                                                                                                                           |                                                                                                                                                                                                                     |
| <i>Theoretical framework</i>                   |                                          |                                                                                                                                           |                                                                                                                                                                                                                     |
| 9                                              | Methodological orientation and theory    | What methodological orientation was stated to underpin the study? e.g. grounded theory, discourse                                         | Study Framework p.3                                                                                                                                                                                                 |

analysis, ethnography,  
phenomenology, content analysis

*Participant selection*

|    |                    |                                                                                          |                                             |
|----|--------------------|------------------------------------------------------------------------------------------|---------------------------------------------|
| 10 | Sampling           | How were participants selected?<br>e.g. purposive, convenience,<br>consecutive, snowball | Participant Sampling and<br>Recruitment p.3 |
| 11 | Method of approach | How were participants approached?<br>e.g. face-to-face, telephone, mail,<br>email        | Participant Sampling and<br>Recruitment p.3 |
| 12 | Sample size        | How many participants were in the<br>study?                                              | Participant Characteristics<br>p.4          |
| 13 | Non-participation  | How many people refused to<br>participate or dropped out?<br>Reasons?                    | Appendix 2. Recruitment<br>Flowchart        |

*Setting*

|    |                                  |                                                                                         |                                    |
|----|----------------------------------|-----------------------------------------------------------------------------------------|------------------------------------|
| 14 | Setting of data collection       | Where was the data collected? e.g.<br>home, clinic, workplace                           | Study protocol cited in p.2        |
| 15 | Presence of non-<br>participants | Was anyone else present besides the<br>participants and researchers?                    | Study protocol cited in p.2        |
| 16 | Description of sample            | What are the important<br>characteristics of the sample? e.g.<br>demographic data, date | Participant Characteristics<br>p.4 |

*Data collection*

|    |                        |                                                                                     |                                                                                                                           |
|----|------------------------|-------------------------------------------------------------------------------------|---------------------------------------------------------------------------------------------------------------------------|
| 17 | Interview guide        | Were questions, prompts, guides<br>provided by the authors? Was it<br>pilot tested? | Appendix 3. Qualitative<br>Interview Guide                                                                                |
| 18 | Repeat interviews      | Were repeat interviews carried out?<br>If yes, how many?                            | Not reported due to word<br>limit. Please note: <i>Repeat<br/>interviews were not<br/>conducted.</i>                      |
| 19 | Audio/visual recording | Did the research use audio or visual<br>recording to collect the data?              | Data Collection p.3                                                                                                       |
| 20 | Field notes            | Were field notes made during<br>and/or after the interview or focus<br>group?       | Not reported due to word<br>limit. Please note: <i>The<br/>interviewer made field<br/>notes after the<br/>interviews.</i> |
| 21 | Duration               | What was the duration of the<br>interviews or focus group?                          | Participant Characteristics<br>p.4                                                                                        |
| 22 | Data saturation        | Was data saturation discussed?                                                      | Data Analysis p.3-4                                                                                                       |
| 23 | Transcripts returned   | Were transcripts returned to<br>participants for comment and/or<br>correction?      | Not reported due to word<br>limit. Please note:<br><i>Transcripts were not<br/>returned to participants.</i>              |

**Domain 3: Analysis and findings**

*Data analysis*

|    |                       |                                         |                     |
|----|-----------------------|-----------------------------------------|---------------------|
| 24 | Number of data coders | How many data coders coded the<br>data? | Data Analysis p.3-4 |
|----|-----------------------|-----------------------------------------|---------------------|

|                  |                                |                                                                                                                                   |                     |
|------------------|--------------------------------|-----------------------------------------------------------------------------------------------------------------------------------|---------------------|
| 25               | Description of the coding tree | Did authors provide a description of the coding tree?                                                                             | Data Analysis p.3-4 |
| 26               | Derivation of themes           | Were themes identified in advance or derived from the data?                                                                       | Data Analysis p.3-4 |
| 27               | Software                       | What software, if applicable, was used to manage the data?                                                                        | Data Analysis p.3-4 |
| 28               | Participant checking           | Did participants provide feedback on the findings?                                                                                | Data Collection p.3 |
| <i>Reporting</i> |                                |                                                                                                                                   |                     |
| 29               | Quotations presented           | Were participant quotations presented to illustrate the themes / findings? Was each quotation identified? e.g. participant number | Results p.4-8       |
| 30               | Data and findings consistent   | Was there consistency between the data presented and the findings?                                                                | Results p.4-8       |
| 31               | Clarity of major themes        | Were major themes clearly presented in the findings?                                                                              | Results p.4-8       |
| 32               | Clarity of minor themes        | Is there a description of diverse cases or discussion of minor themes?                                                            | Not applicable      |

---

## Section 2. Recruitment Flowchart

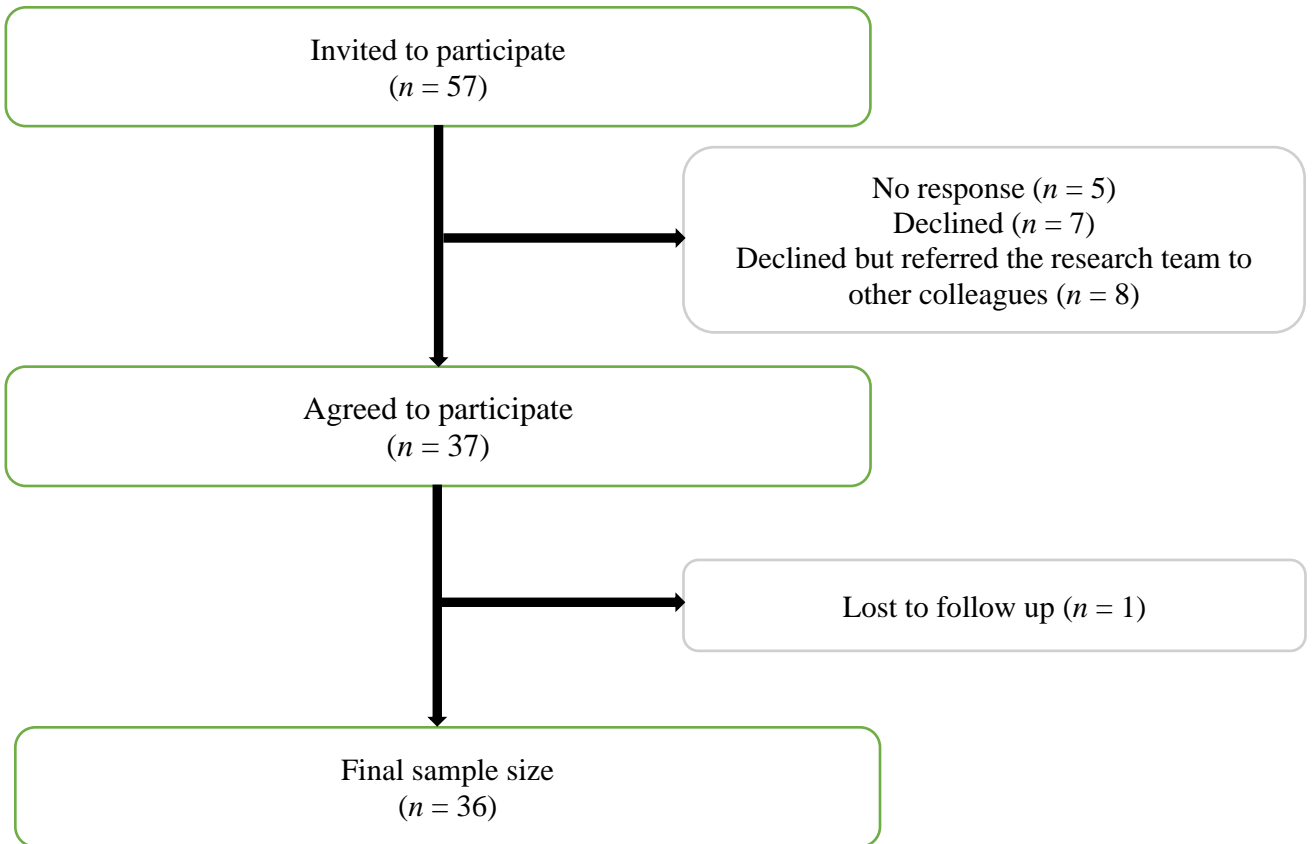

*Note:* Two prospective participants from Quebec were invited to participate (1 no response and 1 declined).

### Section 3. Qualitative Interview Guide

The qualitative interview guide has been published in the study protocol and is publicly available.<sup>1</sup>

We began all interviews by providing participants with an overview of the study and receiving verbal consent. Initial interview questions asked about participants' sociodemographic characteristics and organizational roles. We then proceeded to ask participants about their attitudes and perspectives on 1) the introduction and evolution of MAiD in Canada; 2) the relationship between MAiD and PEOLC; 3) supportive care and important conversations about MAiD; and, 4) the impact of the COVID-19 pandemic on MAiD and PEOLC services. We concluded the interview by summarizing and checking the discussed themes. All participants were given the opportunity to add any further comments and ask questions.

---

<sup>1</sup> Please see “Supplementary Material” in: Shapiro GK, Tong E, Nissim R, Zimmermann C, Allin S, Gibson J, et al. Exploring key stakeholders' attitudes and opinions on medical assistance in dying and palliative care in Canada: A qualitative study protocol. *BMJ Open*. 2021;11(12):e055789.
